# Supplementary material for: Candida albicans stimulates Streptococcus mutans microcolony development via cross-kingdom biofilm-derived metabolites
Source: PubMed Central journal article supplement (PMC5278416; doi:10.1038/srep41332), 2017-01-30
Supplement: srep41332-s1.pdf [file srep41332-s1.pdf]

## Supplementary Information

# ***Candida albicans* stimulates *Streptococcus mutans* microcolony development via cross-kingdom biofilm-derived metabolites**

Dongyeop Kim<sup>1</sup>, Arjun Sengupta<sup>2</sup>, Tagbo H. R. Niepa<sup>3</sup>, Byung-Hoo Lee<sup>4</sup>, Aalim Weljie<sup>2</sup>, Veronica S. Freitas-Blanco<sup>5</sup>, Ramiro M. Murata<sup>5</sup>, Kathleen J. Stebe<sup>3</sup>, Daeyeon Lee<sup>3</sup>, Hyun Koo<sup>1</sup>

<sup>1</sup>Biofilm Research Laboratory, Department of Orthodontics and Divisions of Pediatric Dentistry & Community Oral Health, School of Dental Medicine, University of Pennsylvania, Philadelphia, PA, USA

<sup>2</sup>Department of Systems Pharmacology & Translational Therapeutics, University of Pennsylvania, Philadelphia, PA, USA

<sup>3</sup>Department of Chemical and Biomolecular Engineering, University of Pennsylvania, Philadelphia, PA, USA

<sup>4</sup>Department of Food Science, Gachon University, Seongnam, South Korea

<sup>5</sup>Herman Ostrow School of Dentistry, University of Southern California, Los Angeles, CA, USA

# Figure S1

**A**

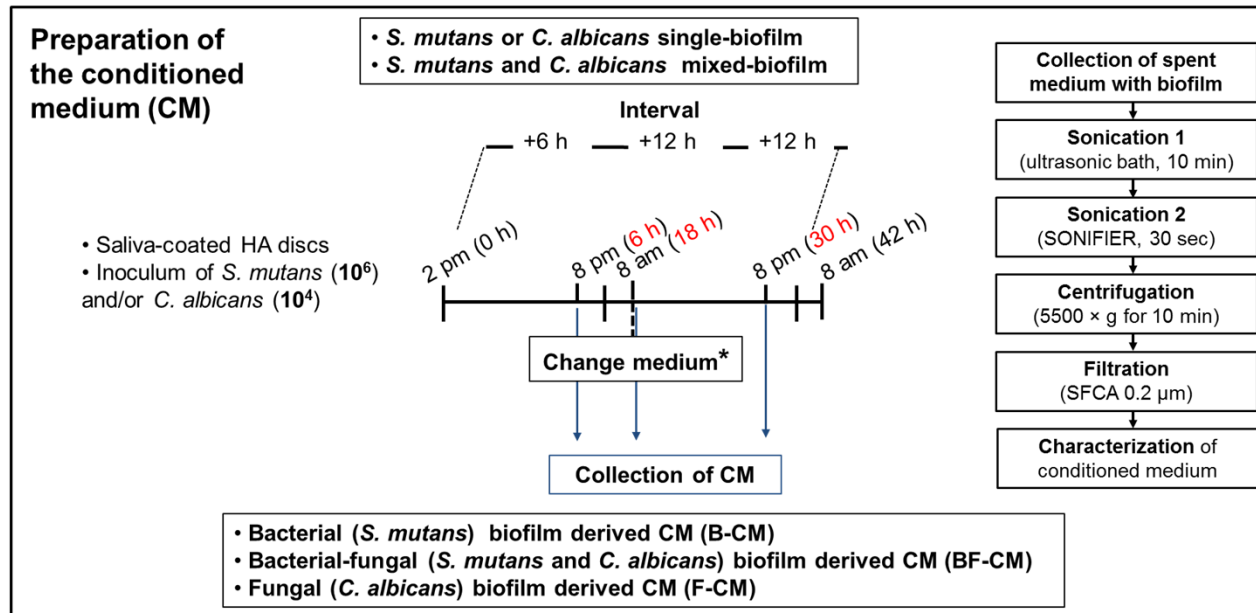

**B**

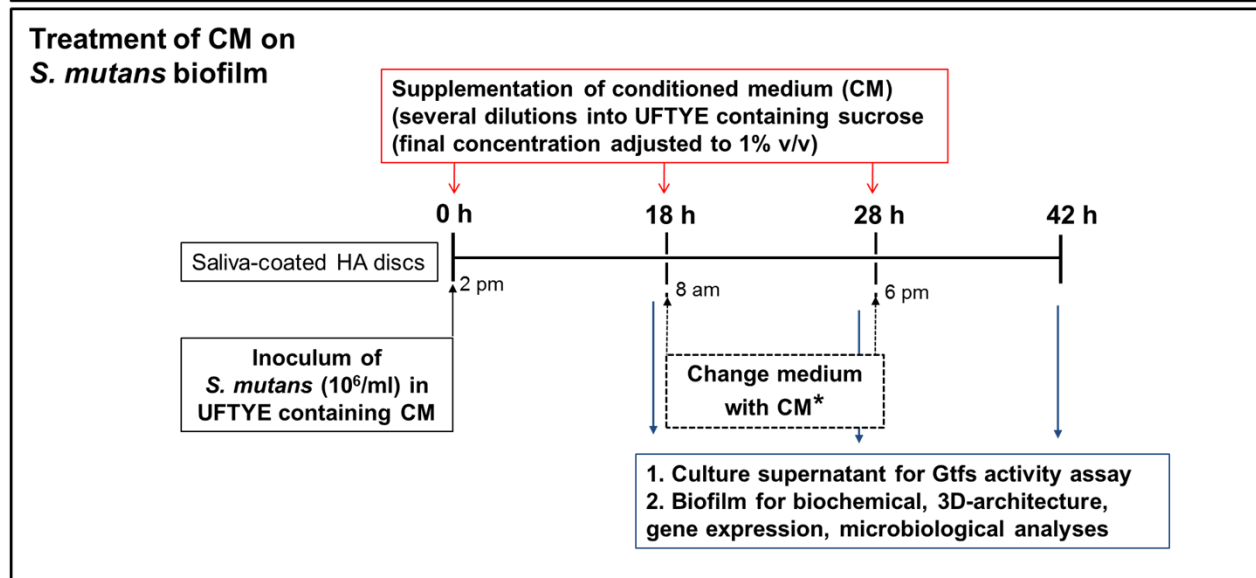

**Figure S1. Experimental design for preparation and treatment of conditioned medium.** Each cell-free conditioned medium (a) was treated to *S. mutans* biofilm (b). \*The discs were dip-washed (removal of non-adhered cells) and transferred to fresh culture medium containing 1% sucrose (change medium).

**Figure S2**

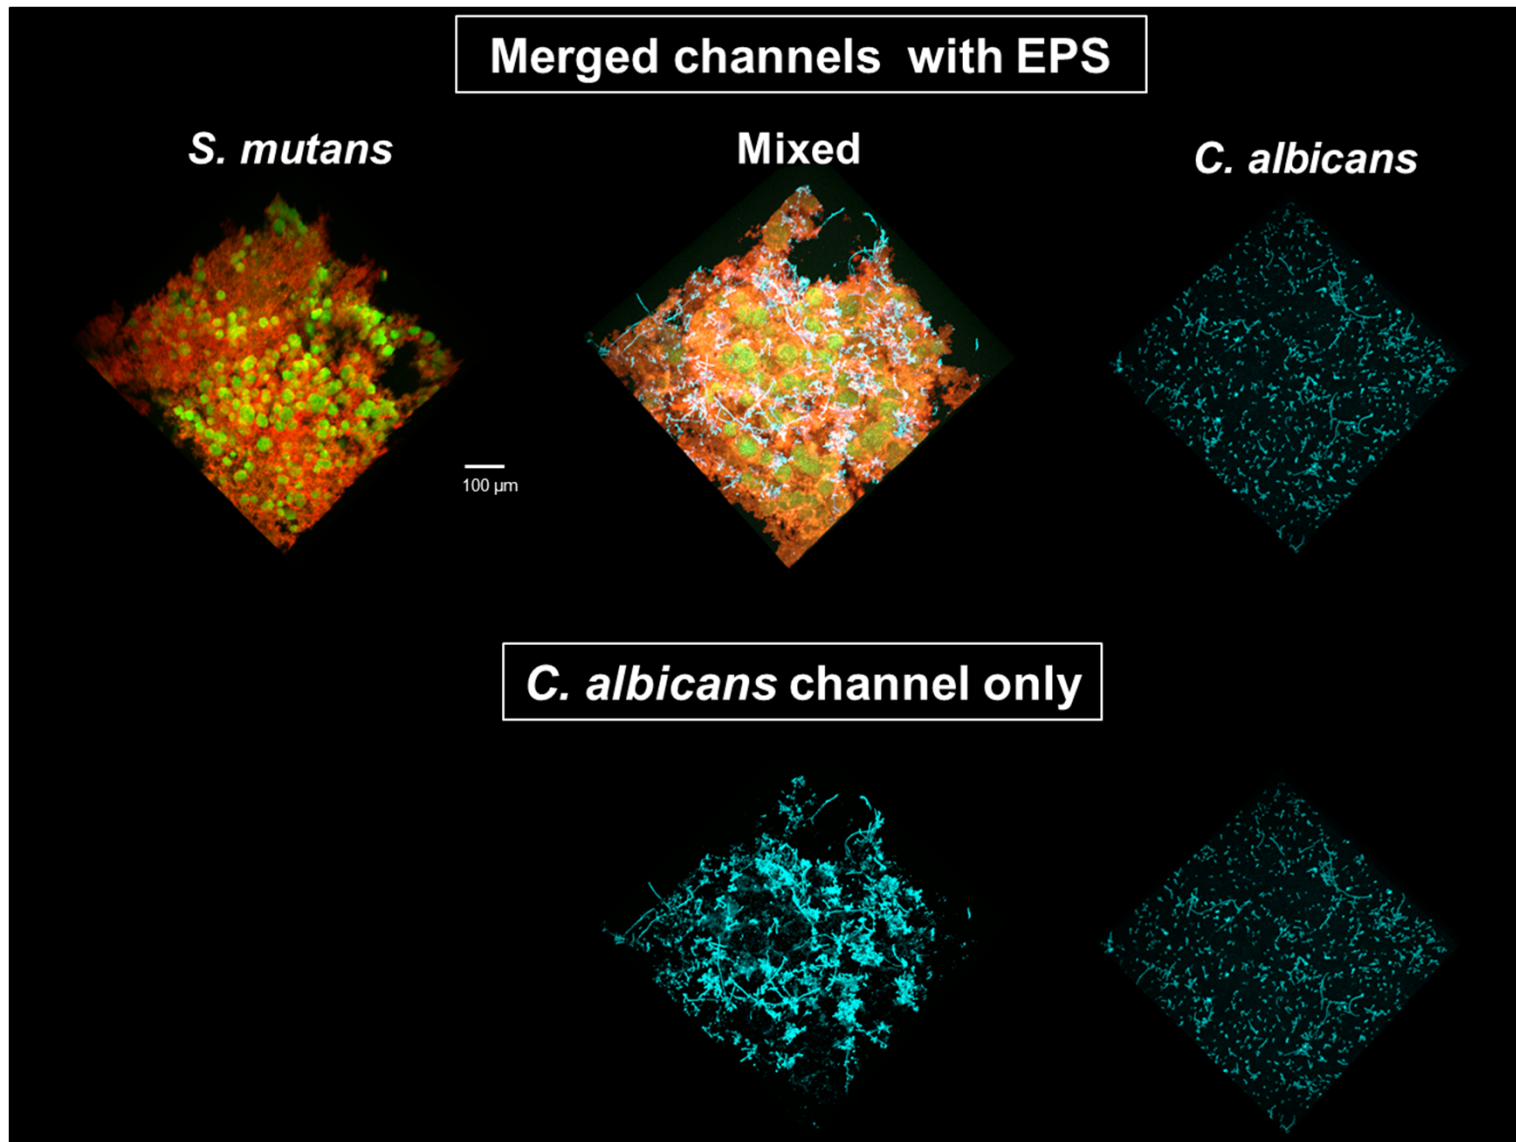

**Figure S2. Representative images of single and co-species biofilms grown for 42 h.** *S. mutans* cells stained with SYTO 9 are depicted in green, while EPS labelled with Alexa Fluor 647 is in red. *C. albicans* cells stained with Concanavalin A-tetramethylrhodamine appear blue.

Figure S3

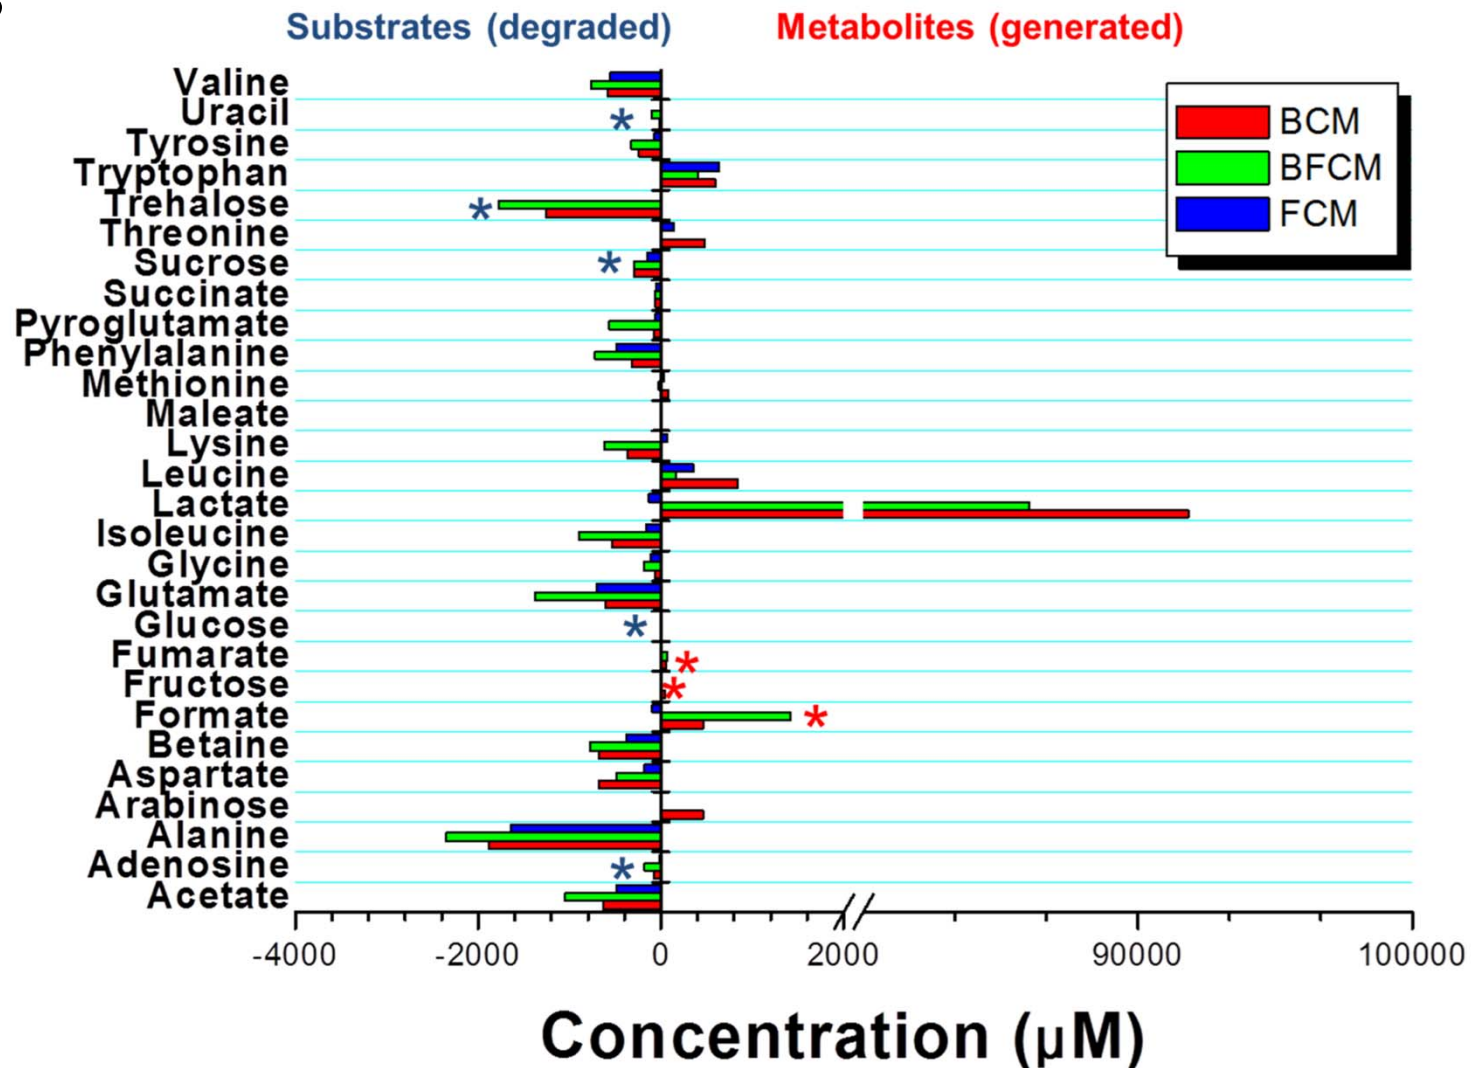

Figure S3. Changes in the concentrations of extracellular metabolites in the conditioned medium (CM). The metabolites were determined by a direct comparison of blank (UFTYE) and CM; higher concentration than the value of blank means metabolites while lower concentration means substrates. The data were subjected to analysis of variance (ANOVA) in the Tukey's HSD test for a multiple comparison (\* $P < 0.01$ ).

**Figure S4**

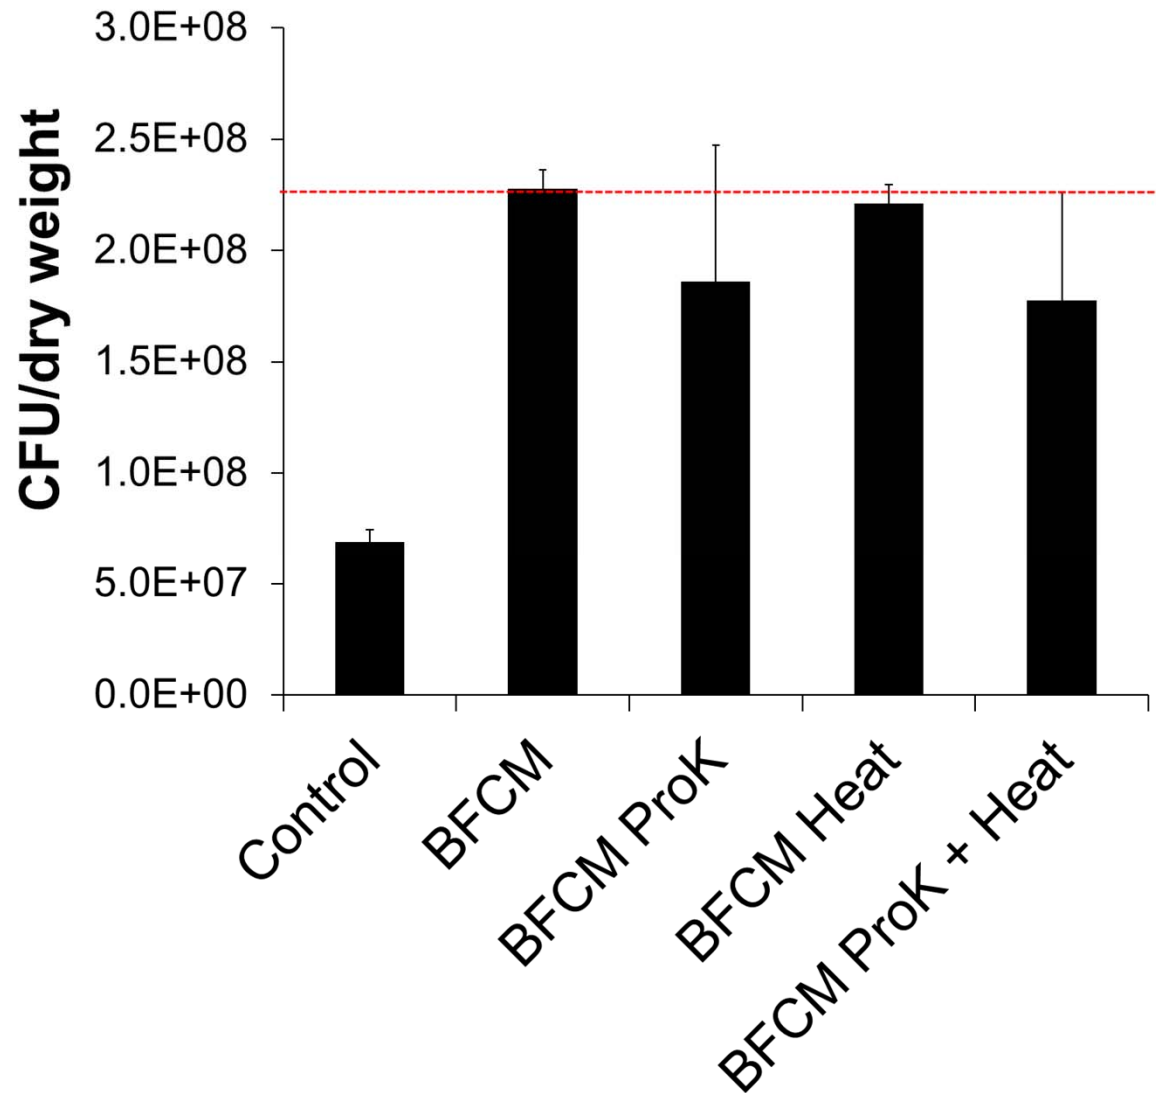

**Figure S4. Physicochemical characterization of bacterial-fungal biofilm derived conditioned medium (BF-CM).** BFCM, original CM; BFCM ProK, proteinase K (100  $\mu\text{g/ml}$ , 37°C for 2 h) treated CM; BFCM Heat, heat (85°C for 0.5) treated CM; BFCM ProK+Heat, proteinase K and heat sequentially treated CM.

Figure S5

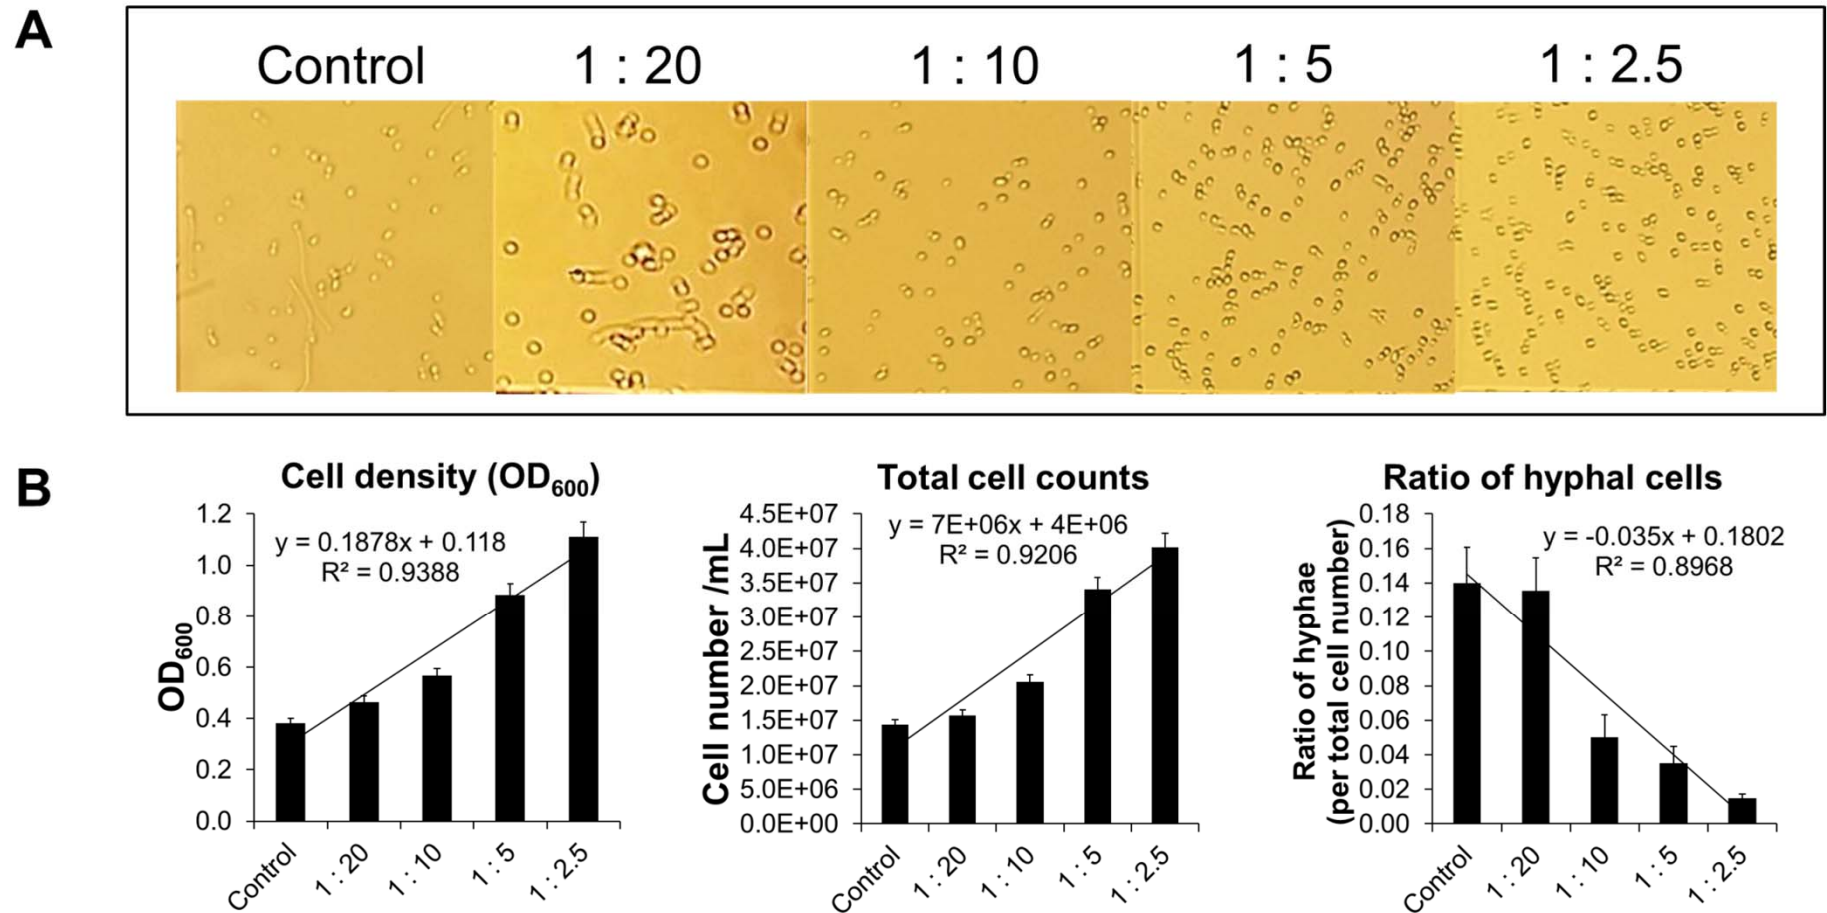

**Figure S5. Morphogenesis of *C. albicans* in the supplementation of BF-CM as a dose-dependent manner.** (A) Influences of BF-CM on morphological change of *C. albicans*. (B) Cell density, total cell number (counted in a hemocytometer) and ratio of hyphal cells were analyzed.

## Figure S6

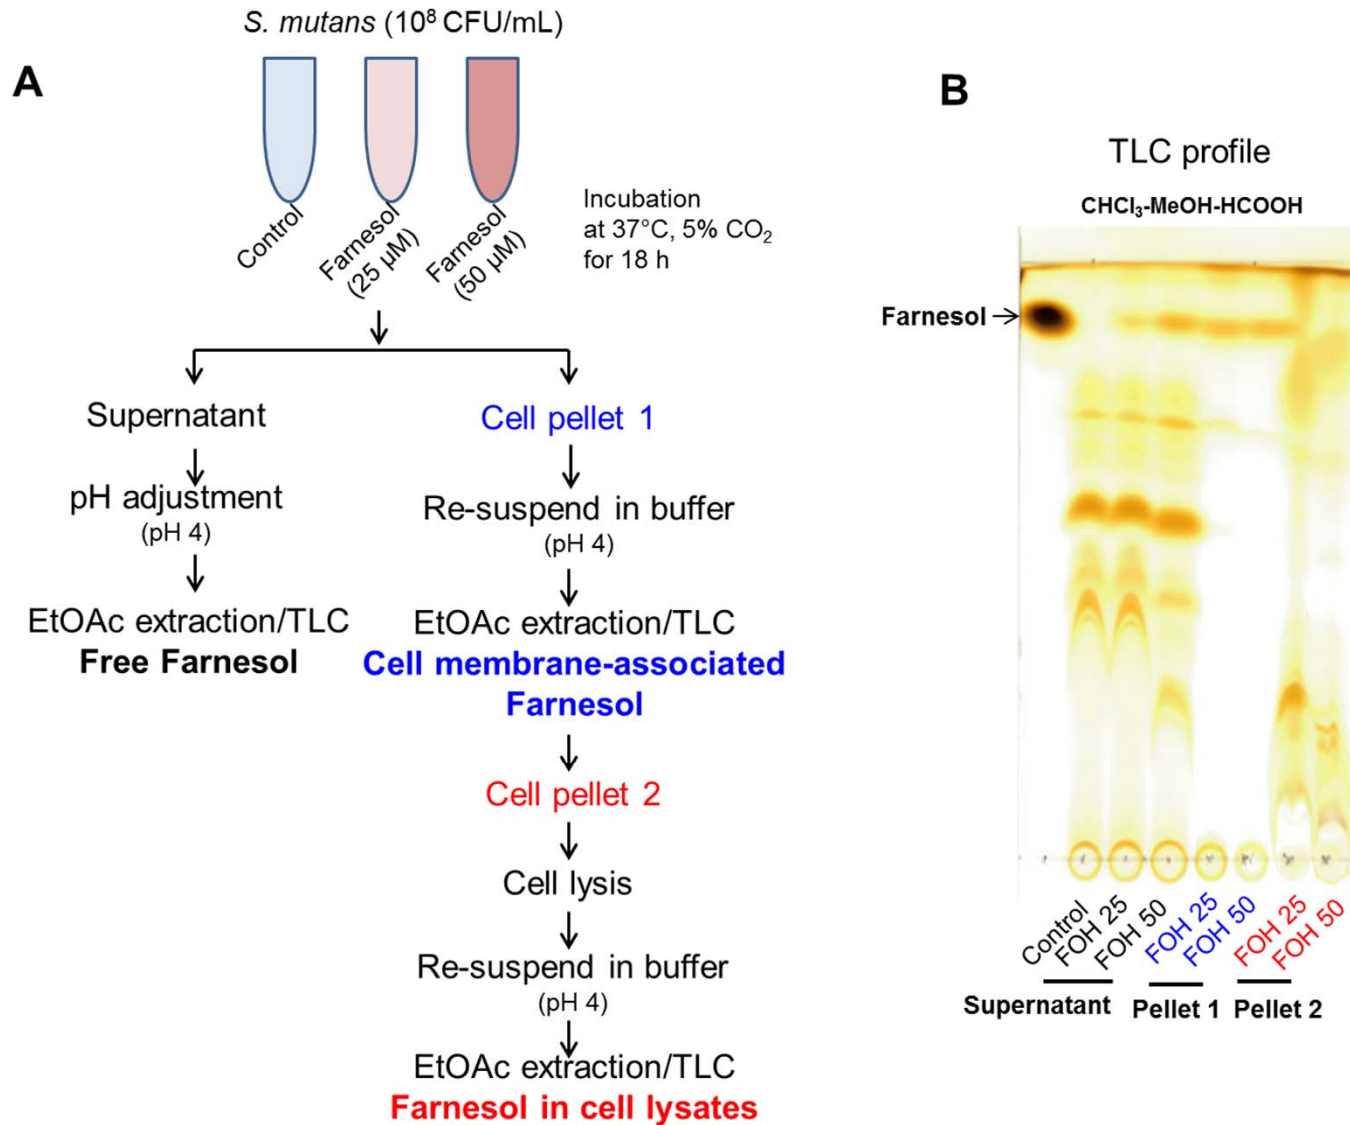

**Figure S6. Detection of farnesol incorporated by *S. mutans*.** (A) Bacterial cell pellets were collected following overnight incubation with farnesol, and then subjected to EtOAc extraction (3 times, 1/5 volume EtOAc) followed by TLC analysis. (B) The EtOAc extracts of cell pellet (Pellet 1; membrane contents were separated into EtOAc layer) contained detectable farnesol, while cell lysates (Pellet 2) showed negligible amounts of farnesol.
